# Supplementary material
Source: MDPI journal article supplement (https://www.mdpi.com/2071-1050/13/14/7651)
Supplement: s1 [file s1 › sustainability-1250739-supplementary.pdf]

## Survey on Daily Lifestyle and Food Waste Generation in Bangkok

[For Reference] SA: single answer, MA: multiple answers, N: number, T: text

### 1. Personal/Household Information

Q1-1: Personal information about the respondents. (T, N)

Name (Mr./Ms.) \_\_\_\_\_  
 Age \_\_\_\_\_  
 Home Address \_\_\_\_\_  
 Tel. (optional) \_\_\_\_\_

Q1-2: Please indicate your education level. (SA)

|   |                                      |
|---|--------------------------------------|
| 1 | No schooling                         |
| 2 | Primary school                       |
| 3 | Lower secondary school               |
| 4 | Upper secondary school (High school) |
| 5 | Vocational or Technical University   |
| 6 | University                           |
| 7 | Master's Degree or Higher            |
| 8 | Other (specifically: _____)          |

Q1-3: Please indicate a number of persons living together in your home. (N)

|                                      |        |  |
|--------------------------------------|--------|--|
| Adult (18-55 years old)              | Male   |  |
|                                      | Female |  |
| Children (Younger than 6 years old)  | Male   |  |
|                                      | Female |  |
| Children (Younger than 18 years old) | Male   |  |
|                                      | Female |  |
| Elderly (More than 55 years old)     | Male   |  |
|                                      | Female |  |

Q1-4: Please indicate your monthly household income (The sum of the monthly income of all people living together). (SA)

|   |                    |
|---|--------------------|
| 1 | < 5000 THB         |
| 2 | 5,001-10,000 THB   |
| 3 | 10,001-15,000 THB  |
| 4 | 15,001-30,000 THB  |
| 5 | 30,001-50,000 THB  |
| 6 | 50,001-100,000 THB |
| 7 | > 100,000 THB      |

Q1-5: Please indicate the type of house you are living in. (SA)

|   |                                |
|---|--------------------------------|
| 1 | Detached house                 |
| 2 | Apartment/Condominium          |
| 3 | Town house/Town home           |
| 4 | Shop house (1st floor is shop) |
| 5 | Dormitory                      |
| 6 | Other (specifically: _____)    |

Q1-6: Please indicate total floor space of your home and period of residence. If there are multiple stories used for residential use, please indicate the total floor space of all stories. (N)

Floor area: \_\_\_\_\_m<sup>2</sup>

Period of residence: \_\_\_\_\_years

## 2. Food waste

The following questions are about the **food waste management** in your household.

Q2-1: Please choose the disposal method of food waste generated in your household, and then specify the way to reuse/recycle your food waste (if applicable). (N&SA)

|                                                                        | Leftover during preparation (peels & scraps, corn stub, etc.) | Leftover of cooked rice | Leftover of cooked dishes | Food passed the "expiration date" |
|------------------------------------------------------------------------|---------------------------------------------------------------|-------------------------|---------------------------|-----------------------------------|
| How to manage/dispose the generated food waste                         |                                                               |                         |                           |                                   |
| Disposal without separation                                            |                                                               |                         |                           |                                   |
| Separation before disposal                                             |                                                               |                         |                           |                                   |
| Reuse/Recycle                                                          |                                                               |                         |                           |                                   |
| For the respondent choosing "Reuse/Recycle", please specify the method |                                                               |                         |                           |                                   |
| Use as ingredient for another dish                                     |                                                               |                         |                           |                                   |
| Give it to other peoples                                               |                                                               |                         |                           |                                   |
| Compost within household                                               |                                                               |                         |                           |                                   |
| Compost by community                                                   |                                                               |                         |                           |                                   |
| Bring to waste bank                                                    |                                                               |                         |                           |                                   |
| Bring to food bank                                                     |                                                               |                         |                           |                                   |
| Others ( _____ )                                                       |                                                               |                         |                           |                                   |

Q2-2: At which level are you concerning about the “expiration date”, when purchasing foods/ingredients at supermarket or other places? (SA)

|   |                                                                           |
|---|---------------------------------------------------------------------------|
| 1 | I always choose the one with a longer “expiration date” even just one day |
| 2 | It depends on what I am buying (type of foods/ingredients)                |
| 3 | I am not really concerning about the “expiration date”                    |
| 4 | Other (specifically: )                                                    |

Q2-3: Have you ever throw away foods/ingredients without eating them at all? (SA)

|   |           |
|---|-----------|
| 1 | Often     |
| 2 | Sometimes |
| 3 | Rarely    |
| 4 | Never     |

If you chose choice (1) or (2) above, please select top 3 reasons for throwing away foods/ingredients from the list given below. (MA – 1,2,3)

|  |                                           |
|--|-------------------------------------------|
|  | The deterioration of quality              |
|  | Passing the “expiration date”             |
|  | Excessive amount of foods (overabundance) |
|  | Not delicious                             |
|  | Already bought new ones                   |
|  | Having no plan to consume further         |
|  | Be bored and dissatisfied                 |
|  | Other (specifically: )                    |

Q2-4: Do you check foods/ingredients in the refrigerator before going out for shopping? (SA)

|   |                                                                                 |
|---|---------------------------------------------------------------------------------|
| 1 | I must check before going out for shopping                                      |
| 2 | I usually check before going out for shopping                                   |
| 3 | I sometimes check before going out for shopping                                 |
| 4 | I rarely check before going out for shopping                                    |
| 5 | I never check before going out for shopping                                     |
| 6 | I remember all foods/ingredients in the refrigerator without having to check it |

Q2-5: Have you ever made the “leftovers” when eating out at, for example, the restaurant? (SA)

|   |           |
|---|-----------|
| 1 | Often     |
| 2 | Sometimes |
| 3 | Rarely    |
| 4 | Never     |

If you chose choice (1) or (2) above, please select top 3 reasons for the “leftovers” from the list given below. (MA – 1,2,3)

|  |                                                                             |
|--|-----------------------------------------------------------------------------|
|  | I ordered a lot because I am too concerned about my own image in the public |
|  | I wanted to have a variety of dishes                                        |
|  | I just ordered too much                                                     |
|  | The volume of each dish was so big to eat up                                |
|  | I did not like the taste                                                    |
|  | I was bored and dissatisfied after tasting a few bites                      |
|  | Other (specifically: )                                                      |

Q2-6: Which of the following choices can best describe about your attempt to reduce food waste?

(SA)

|   |                                                               |
|---|---------------------------------------------------------------|
| 1 | I will remain as I am now, since I seldomly throw away foods. |
| 2 | I am now trying my best not to waste foods                    |
| 3 | I want to take some action                                    |
| 4 | I have no plan to do in a near future                         |

If you chose choice (2) or (3) above, please select top 3 behaviours reflecting your effort to reduce food waste from the list given below. (MA – 1,2,3)

|  |                                                                        |
|--|------------------------------------------------------------------------|
|  | Not cook too much                                                      |
|  | Not order too much when eating out                                     |
|  | Regularly check food left over in the refrigerator or cupboard         |
|  | Try not to throw food away by checking the “expiration date” regularly |
|  | Avoid a bulk purchase (a big lot of the same thing)                    |
|  | Avoid shopping too many things                                         |
|  | Plan for a list of dishes in each meal in advance                      |
|  | Contrive how to make another dish from the leftovers                   |
|  | Try to eat everything up                                               |
|  | Ask the restaurant to reduce the volume of each dish when ordering     |
|  | Carry the leftovers home (with a doggie bag)                           |
|  | Other (specifically: )                                                 |

### 3. General household waste

Q3-1: Do you regularly separate household waste (garbage) before disposal? (SA)

|   |                                            |
|---|--------------------------------------------|
| 1 | I always separate waste before disposal    |
| 2 | I sometimes separate waste before disposal |
| 3 | I never separate waste before disposal     |
| 4 | Other (specifically: )                     |

Q3-2: Please indicate the method you choose for the disposal of following household wastes. (SA)

| Household waste              | Throw away without separation | Give it to the housekeeper (cleaning staff) | Bring it to the garbage station | Sell it to the waste collector | Donation to relevant foundation | Other (specifically: ) |
|------------------------------|-------------------------------|---------------------------------------------|---------------------------------|--------------------------------|---------------------------------|------------------------|
| 1. Newspaper                 |                               |                                             |                                 |                                |                                 |                        |
| 2. PET bottle                |                               |                                             |                                 |                                |                                 |                        |
| 3. Aluminum can              |                               |                                             |                                 |                                |                                 |                        |
| 4. Glass bottle              |                               |                                             |                                 |                                |                                 |                        |
| 5. Clothes                   |                               |                                             |                                 |                                |                                 |                        |
| 6. Electric appliances       |                               |                                             |                                 |                                |                                 |                        |
| 7. Bulky rubbish (furniture) |                               |                                             |                                 |                                |                                 |                        |

**Thank you very much for your assistance with our research and planning efforts.**
